# Supplementary material for: Cross-tissue analysis of allelic X-chromosome inactivation ratios resolves features of human development
Source: bioRxiv or medRxiv preprint supplement (doi:10.1101/2021.09.13.460075), 2021-09-14

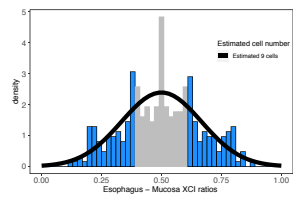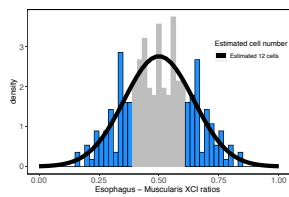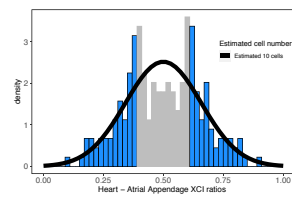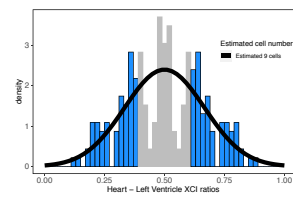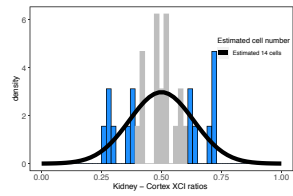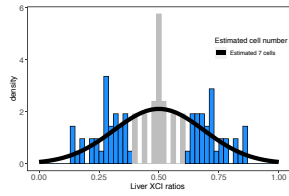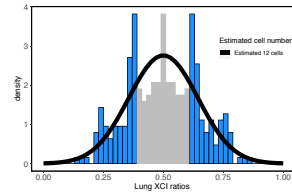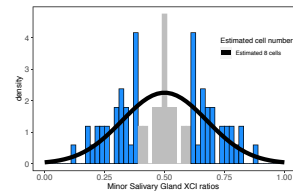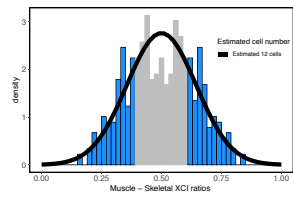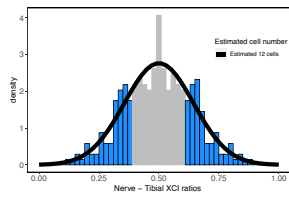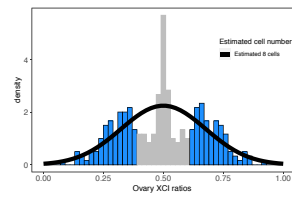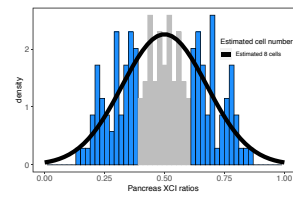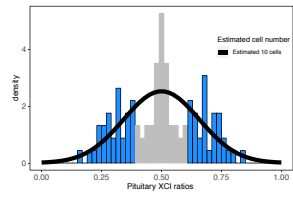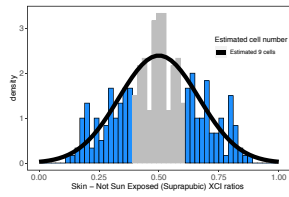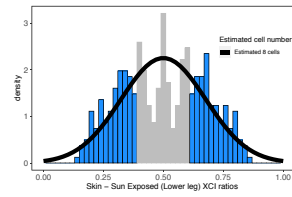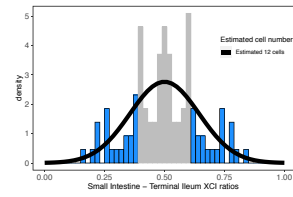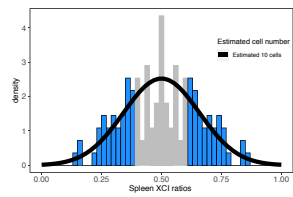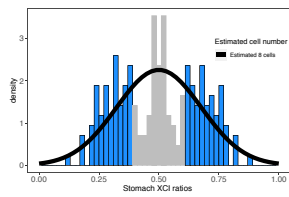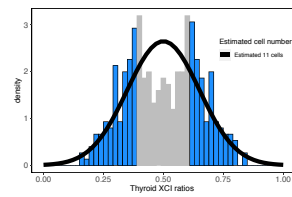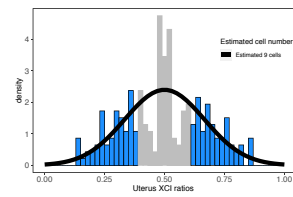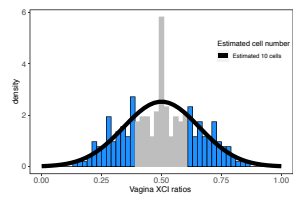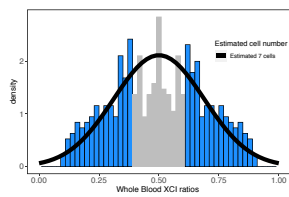

Supplement: Supplementary file [file media-10.pdf]
