# Supplementary material for: Cross-tissue analysis of allelic X-chromosome inactivation ratios resolves features of human development
Source: bioRxiv or medRxiv preprint supplement (doi:10.1101/2021.09.13.460075), 2021-09-14

## a SNP filtering criteria

- Exclude PAR regions of the X-chromosome
- Require a minimum of 10 reads per allele
- Filter known escape genes
- SNPs must be included in dbSNP
- Exclude SNPs with total expression greater than 3000 reads
- Filter genes exhibiting reference bias and bimodal reference SNP distributions

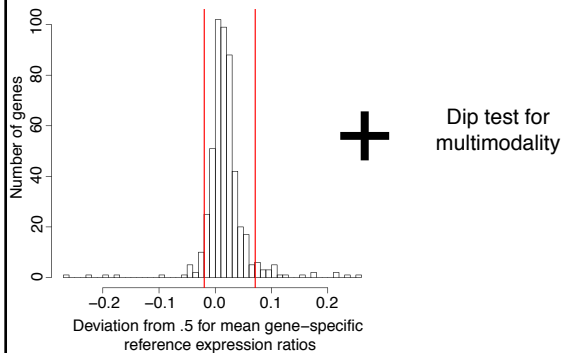

## b

Non-biased examples

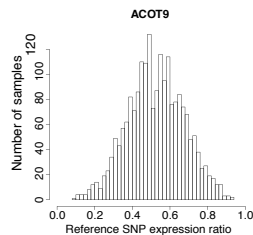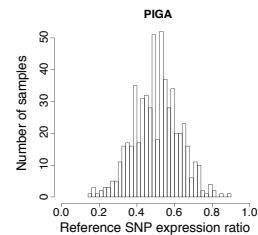

Bimodal examples

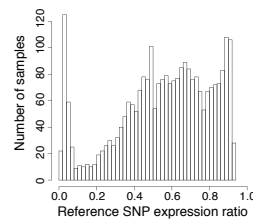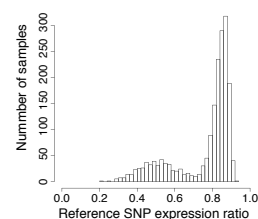

Reference biased examples

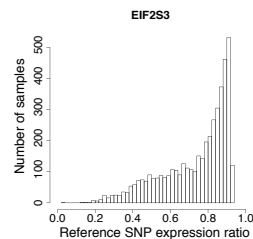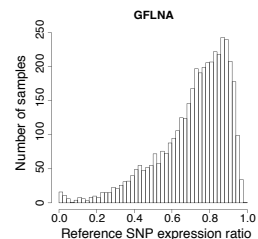

## c

All heterozygous SNPs before gene filtering

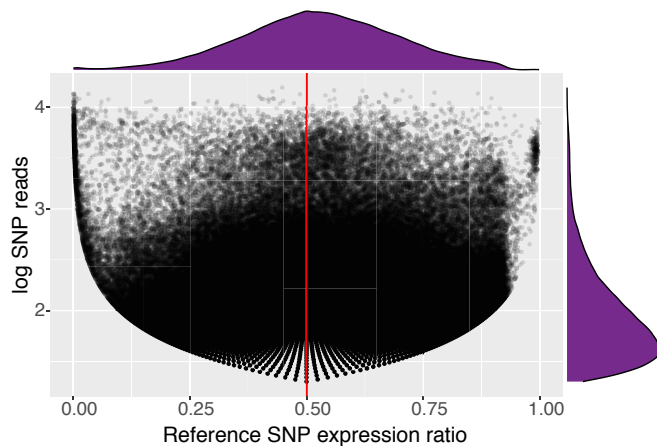

## d

All heterozygous SNPs after gene filtering.  
Representing 542 genes

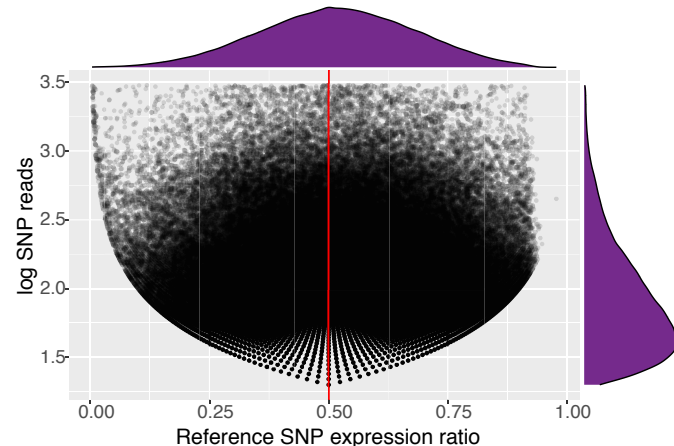

Supplement: Supplementary file [file media-3.pdf]
