# Supplementary material for: Cross-tissue analysis of allelic X-chromosome inactivation ratios resolves features of human development
Source: bioRxiv or medRxiv preprint supplement (doi:10.1101/2021.09.13.460075), 2021-09-14

**a** Mean donor skew threshold: 0.65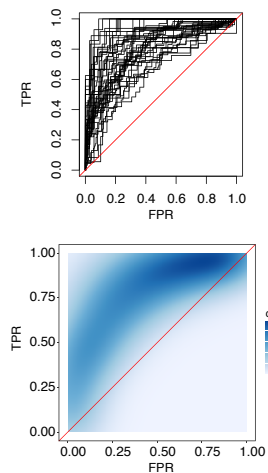

Mean donor skew threshold: 0.70

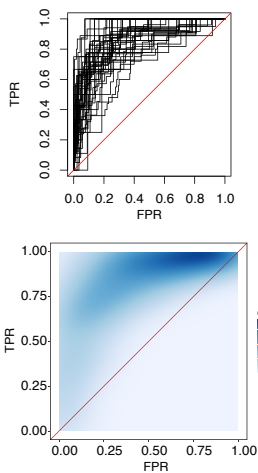

Mean donor skew threshold: 0.75

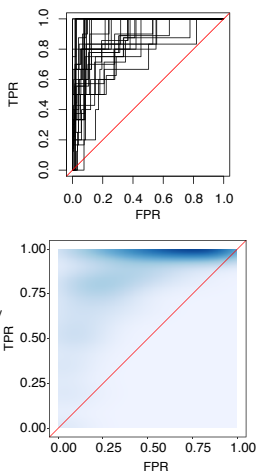**b**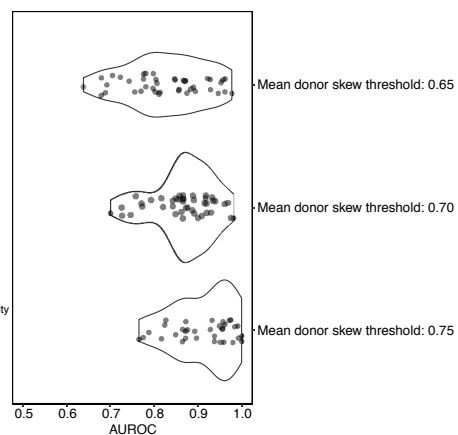**c**

Ectoderm

Mesoderm

Endoderm

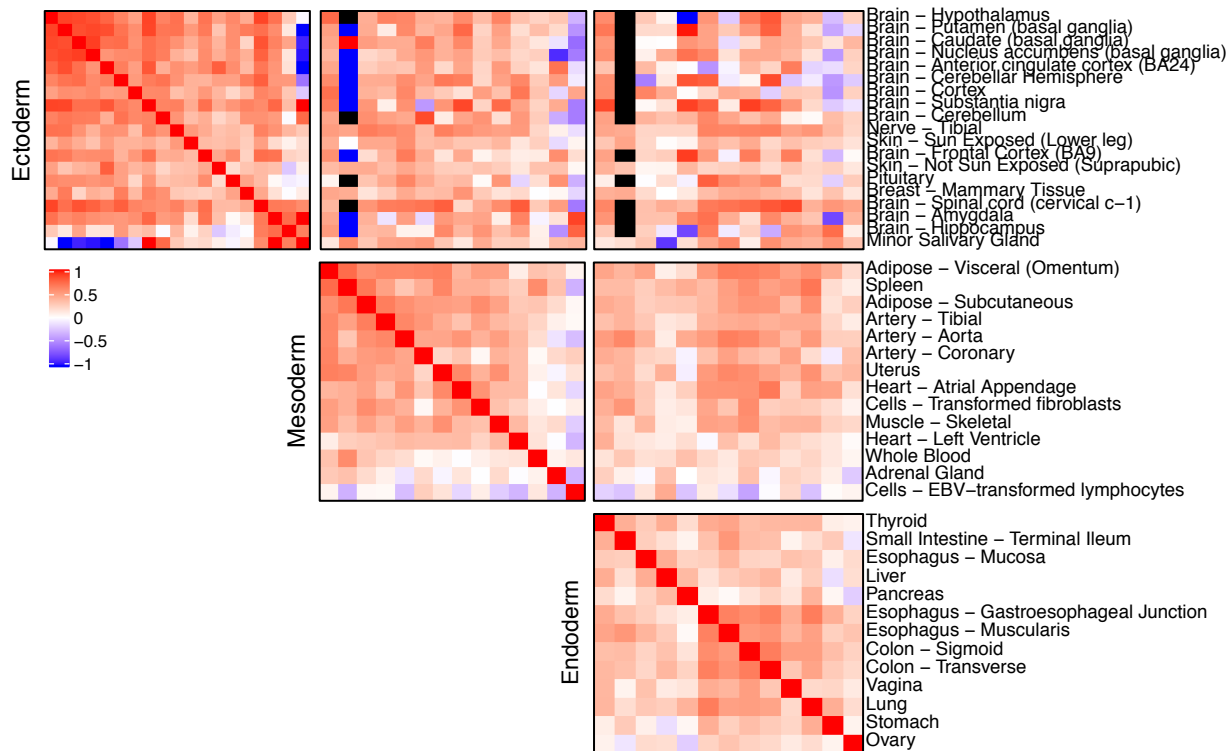

Supplement: Supplementary file [file media-7.pdf]
