# Supplementary material for: Cross-tissue analysis of allelic X-chromosome inactivation ratios resolves features of human development
Source: bioRxiv or medRxiv preprint supplement (doi:10.1101/2021.09.13.460075), 2021-09-14
Supplement: Supplementary file [file media-11.pdf]

| gene           | escape_label       |
|----------------|--------------------|
| OPHN1          | confident inactive |
| MAMLD1         | confident inactive |
| RP11-1148L6.5  | confident inactive |
| CXorf40B       | confident inactive |
| WDR45          | confident inactive |
| TREX2          | confident inactive |
| ACOT9          | confident inactive |
| ARMCX5-GPRASP2 | confident inactive |
| PIR            | confident inactive |
| PLXNA3         | confident inactive |
| GPC4           | confident inactive |
| DMD            | confident inactive |
| HEPH           | confident inactive |
| PRPS2          | confident inactive |
| SRPK3          | confident inactive |
| SLC6A8         | confident inactive |
| TMEM47         | confident inactive |
| EFNB1          | confident inactive |
| MIR503HG       | confident inactive |
| PNMA3          | confident inactive |
| RP5-972B16.2   | confident inactive |
| CHRD1          | confident inactive |
| SAT1           | confident inactive |
| USP11          | confident inactive |
| COL4A6         | confident inactive |
| TCEAL2         | confident inactive |
| TSPYL2         | confident inactive |
| PLS3           | confident inactive |
| BEX1           | confident inactive |
| TSC22D3        | confident inactive |
| MSN            | confident inactive |
| SYN1           | confident inactive |
| TMSB4X         | confident inactive |
| YIPF6          | inactive           |
| RLIM           | inactive           |
| TBC1D25        | inactive           |
| ZBTB33         | inactive           |
| PHF6           | inactive           |
| ZNF75D         | inactive           |
| THOC2          | inactive           |
| PHKA2          | inactive           |
| MORC4          | inactive           |
| GAB3           | inactive           |
| MTMR1          | inactive           |

|             |          |
|-------------|----------|
| RPS6KA3     | inactive |
| MED12       | inactive |
| INTS6L      | inactive |
| SCML1       | inactive |
| WDR13       | inactive |
| APEX2       | inactive |
| ATP11C      | inactive |
| ARHGAP6     | inactive |
| ELF4        | inactive |
| PHF8        | inactive |
| TAF9B       | inactive |
| MAP7D3      | inactive |
| FAM122B     | inactive |
| SLC25A43    | inactive |
| SMIM10      | inactive |
| ABCD1       | inactive |
| RBBP7       | inactive |
| DLG3        | inactive |
| C1GALT1C1   | inactive |
| SLC25A53    | inactive |
| LINC01278   | inactive |
| TBL1X       | inactive |
| ZNF275      | inactive |
| TMEM164     | inactive |
| PRPS1       | inactive |
| ARMCX1      | inactive |
| FMR1        | inactive |
| HUWE1       | inactive |
| ZMAT1       | inactive |
| AIFM1       | inactive |
| SLC9A6      | inactive |
| PJA1        | inactive |
| HCFC1       | inactive |
| NSDHL       | inactive |
| FAM127C     | inactive |
| OCRL        | inactive |
| GRIPAP1     | inactive |
| RBM10       | inactive |
| APOO        | inactive |
| ZDHHC9      | inactive |
| ARMCX3      | inactive |
| ZMYM3       | inactive |
| UBL4A       | inactive |
| GS1-358P8.4 | inactive |
| EBP         | inactive |

|           |          |
|-----------|----------|
| REPS2     | inactive |
| CLCN4     | inactive |
| WWC3      | inactive |
| LAGE3     | inactive |
| DOCK11    | inactive |
| DKC1      | inactive |
| ARMCX2    | inactive |
| SLC9A7    | inactive |
| IL13RA1   | inactive |
| VBP1      | inactive |
| MAGEH1    | inactive |
| TAZ       | inactive |
| TSPAN6    | inactive |
| HDAC6     | inactive |
| SNX12     | inactive |
| GABRE     | inactive |
| TFE3      | inactive |
| TSR2      | inactive |
| HTATSF1   | inactive |
| TIMM17B   | inactive |
| LINC01420 | inactive |
| FAM3A     | inactive |
| RBMX      | inactive |
| PDHA1     | inactive |
| FAM127B   | inactive |
| XIST      | inactive |
| G6PD      | inactive |
| PRAF2     | inactive |
| CD99L2    | inactive |
| BEX4      | inactive |
| HNRNPH2   | inactive |
| NONO      | inactive |
| LDOC1     | inactive |
| ATP6AP2   | inactive |
| TCEAL3    | inactive |
| MAGED1    | inactive |
| MAOB      | inactive |
| SH3BGRL   | inactive |
| GDI1      | inactive |
| IDS       | inactive |
| ATP6AP1   | inactive |
| MORF4L2   | inactive |
| RBM3      | inactive |
| MAGED2    | inactive |
| TSIX      | inactive |

|               |              |
|---------------|--------------|
| TCEAL4        | inactive     |
| SLC25A5       | inactive     |
| ARSD          | known escape |
| CA5B          | known escape |
| CDK16         | known escape |
| CXorf38       | known escape |
| DDX3X         | known escape |
| EIF1AX        | known escape |
| GEMIN8        | known escape |
| GPM6B         | known escape |
| GYG2          | known escape |
| IQSEC2        | known escape |
| KDM6A         | known escape |
| MAOA          | known escape |
| MED14         | known escape |
| MSL3          | known escape |
| MXRA5         | known escape |
| NAP1L3        | known escape |
| PLXNB3        | known escape |
| PNPLA4        | known escape |
| PRKX          | known escape |
| RENBP         | known escape |
| RP11-706O15.1 | known escape |
| SMC1A         | known escape |
| STS           | known escape |
| SYAP1         | known escape |
| SYTL4         | known escape |
| TRAPPC2       | known escape |
| TXLNG         | known escape |
| UBA1          | known escape |
| USP9X         | known escape |
| XG            | known escape |
| ZFX           | known escape |
| ZRSR2         | known escape |
| CTPS2         | novel escape |
| CASK          | novel escape |
| ATRX          | novel escape |
| STARD8        | novel escape |
| NLGN4X        | novel escape |
| MECP2         | novel escape |
| CLIC2         | novel escape |
| F8            | novel escape |
| PGK1          | novel escape |
| SEPT6         | novel escape |
| MPP1          | novel escape |

|         |              |
|---------|--------------|
| EMD     | novel escape |
| CXorf36 | novel escape |
| ARHGAP4 | novel escape |
| BTK     | novel escape |
| COX7B   | novel escape |
| RPL36A  | novel escape |
| VSIG4   | novel escape |
| SASH3   | novel escape |
| PDZD4   | novel escape |
| PLP1    | novel escape |
